# Supplementary material for: A plasmon resonance-inspired discriminator unscrambles lipoprotein subtypes
Source: Royal Society of Chemistry journal article supplement (doi:10.1039/d2an00550f), 2022-01-01
Supplement: d2an00550f1.pdf [file d2an00550f1.pdf]

Supporting information

## **Plasmon Resonance-Inspired Discriminator Unscrambles Lipoprotein**

### **Subtypes**

Jianfang Cao, Mingshu Shuai, Yang Shu\*, Jianhua Wang\*

Research Center for Analytical Sciences, Department of Chemistry, College of Sciences,  
Northeastern University, Shenyang 110819, China

\*Corresponding author.

E-mail: shuyang@mail.neu.edu.cn; jianhuajrz@mail.neu.edu.cn;

Tel: 86-24-83688944

## **2. Experimental section**

### **2.1. Reagents and chemicals**

Cytochrome C (Cyt-c), Lysozyme (LZ), Hemoglobin (Hb), Myoglobin (Mb), Human serum albumin (HSA), Trypsin (Tps),  $\alpha$ -Casein, Ovalbumin (Ova),  $\gamma$ -Globulin ( $\gamma$ -Glo) and Immunoglobulin G (IgG) were purchased from Sigma-Aldrich (St. Louis, USA). Low-Density Lipoprotein (LDL), Oxidized Low-Density Lipoprotein (Ox-LDL), High-Density Lipoprotein (HDL), and Very Low-Density Lipoprotein (VLDL) were received from Yiyuan Biotech Co (Guangzhou, China). Chloroauric acid ( $\text{HAuCl}_4 \cdot 4\text{H}_2\text{O}$ ), ascorbic acid (AA), silver nitrate ( $\text{AgNO}_3$ ) and HCl were obtained from Sinopharm Chemical Reagent Co., Ltd (Shenyang, China). Hexadecyl trimethyl ammonium bromide (CTAB) was obtained from Dalian Meilun Biotechnology Co., Ltd (Dalian, China). Sodium borohydride ( $\text{NaBH}_4$ ) was obtained from Aladdin Biochemical Technology Co., Ltd (Shanghai, China). Poly(sodium-p-styrenesulfonate) (PSS) was obtained from Yuanye Bio-Technology Co., Ltd (Shanghai, China). All the reagents were at least of analytical reagent grade and used without further purification. The anti-LDL aptamer fragment with 40 bases (5'-ACCT CGAT TTTA TATT ATTT CGCT TACC AACA ACTG CAGA-3') was determined according to the reference<sup>1</sup> and synthesized by Sangon Biotechnology Co. Ltd (Shanghai, China). The clinical samples were provided by "The Second Affiliated Hospital of Shenyang Medical College". Deionized (DI) water of 18 M $\Omega$  was used throughout. The biological relevant concentrations of LDL, HDL and VLDL in healthy human serum were 1.063-1.03 mg/mL, 1.21-1.063 mg/mL and 1.006 mg/mL, respectively.<sup>2</sup>

### **2.2. Instrumentation**

Transmission electron microscopy (TEM) images were recorded on a Tecnai G20 microscope (Hillsboro, USA). Ultraviolet-visible (UV-vis) absorption spectra were recorded on a UV-3900 Spectrophotometer (Hitachi Corporation). The absorption spectra were recorded on a Synergy H1 microplate reader (Biotek, USA) at room temperature. The zeta potentials were recorded on a Zetasizer Nano S90 (Malvern, UK). The standard clinical test of clinical samples is completed by Roche biochemical analyzer, P800 (Roche, Germany).

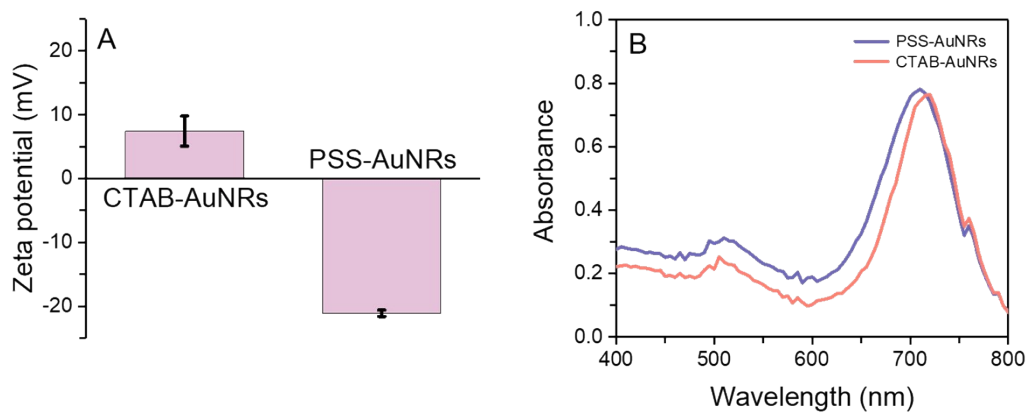

**Fig. S1** (A) Zeta potentials of the as-prepared CTAB-AuNRs and PSS-AuNRs dispersed in aqueous solution; (B) UV-Vis absorption spectra of the CTAB-AuNRs and PSS-AuNRs.

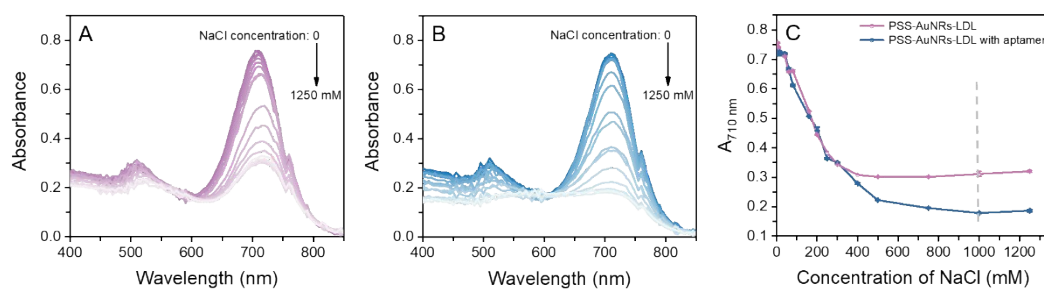

**Fig. S2** (A) UV-Vis absorption spectra of PSS-AuNRs dispersions with LDL and various concentrations of NaCl in 5 mM PB buffer (LDL: 7.5  $\mu\text{g}/\text{mL}$ ); (B) UV-Vis absorption spectra of PSS-AuNRs dispersions with LDL, aptamer and various concentrations of NaCl in 5 mM PB buffer (LDL: 7.5  $\mu\text{g}/\text{mL}$ ; aptamer: 1  $\mu\text{M}$ ); (C) The maximum absorbance values of  $A_{710\text{ nm}}$  (no aptamer) and  $A_{710\text{ nm}}$  (with aptamer) for PSS-AuNRs-LDL as a function of various concentrations of NaCl.

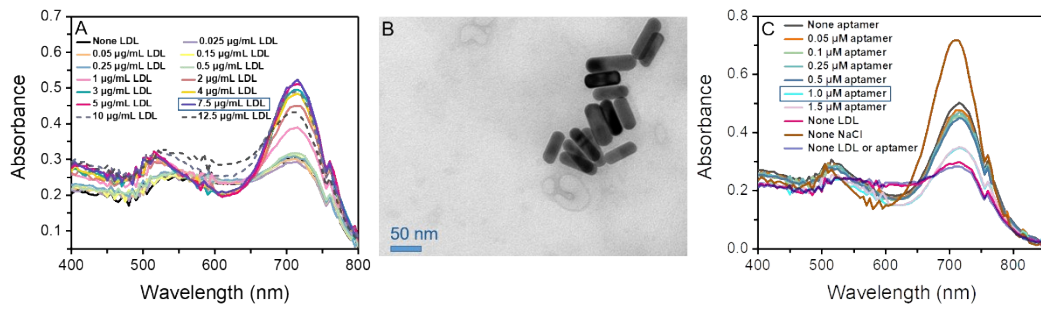

**Fig. S3** (A) UV-Vis absorption spectra of PSS-AuNRs dispersions with various concentrations of LDL in PB buffer containing 1000 mM NaCl; (B) The transmission electron microscope (TEM) images of PSS-AuNRs with excessive LDL in 1000 mM NaCl; (C) UV-Vis absorption spectra of PSS-AuNRs-LDL dispersions with various concentrations of aptamer in PB buffer containing 1000 mM NaCl (LDL: 7.5  $\mu\text{g/mL}$ ).

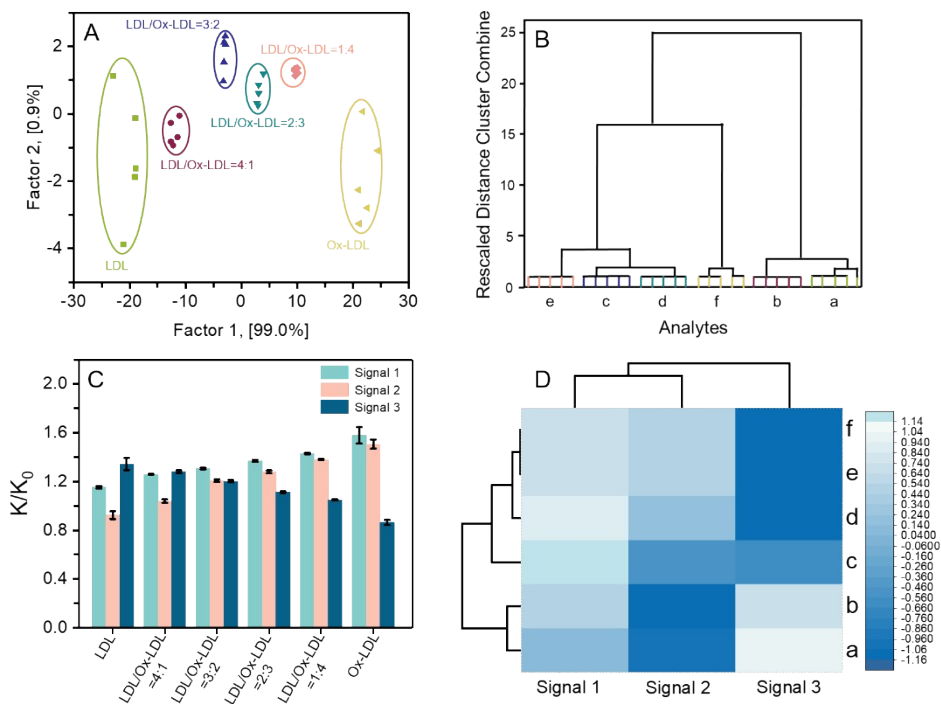

**Fig. S4** (A) LDA plot and (B) HCA dendrogram for the mixture of LDL and Ox-LDL, as well as pure LDL and Ox-LDL; (C) The fingerprints of the binary mixture based on the patterns of the corresponding values of  $K/K_0$ ; (D) The cluster analysis heat map derived from the discriminator platform (a: LDL; b: LDL/Ox-LDL=4:1; c: LDL/Ox-LDL=3:2; d: LDL/Ox-LDL=2:3; e: LDL/Ox-LDL=1:4; f: Ox-LDL).

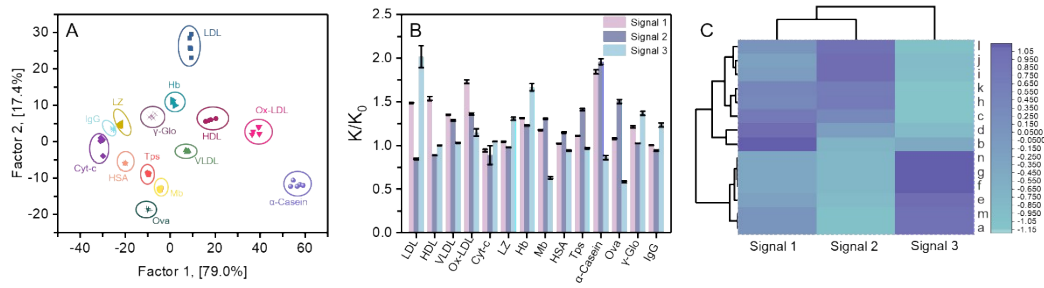

**Fig. S5** (A) LDA plot and (B) the fingerprint of LDL, HDL, VLDL, Ox-LDL, Cyt-c, LZ, Hb, Mb, HSA, Tps,  $\alpha$ -Casein, Ova,  $\gamma$ -Glo and IgG; (C) The cluster analysis heat map derived from the discriminator platform (a: LDL; b: HDL; c:VLDL; d: Ox-LDL; e: Cyt-c; f: LZ; g: Hb; h: Mb; i: HSA; j: Tps; k:  $\alpha$ -Casein; l: Ova; m:  $\gamma$ -Glo; n: IgG).

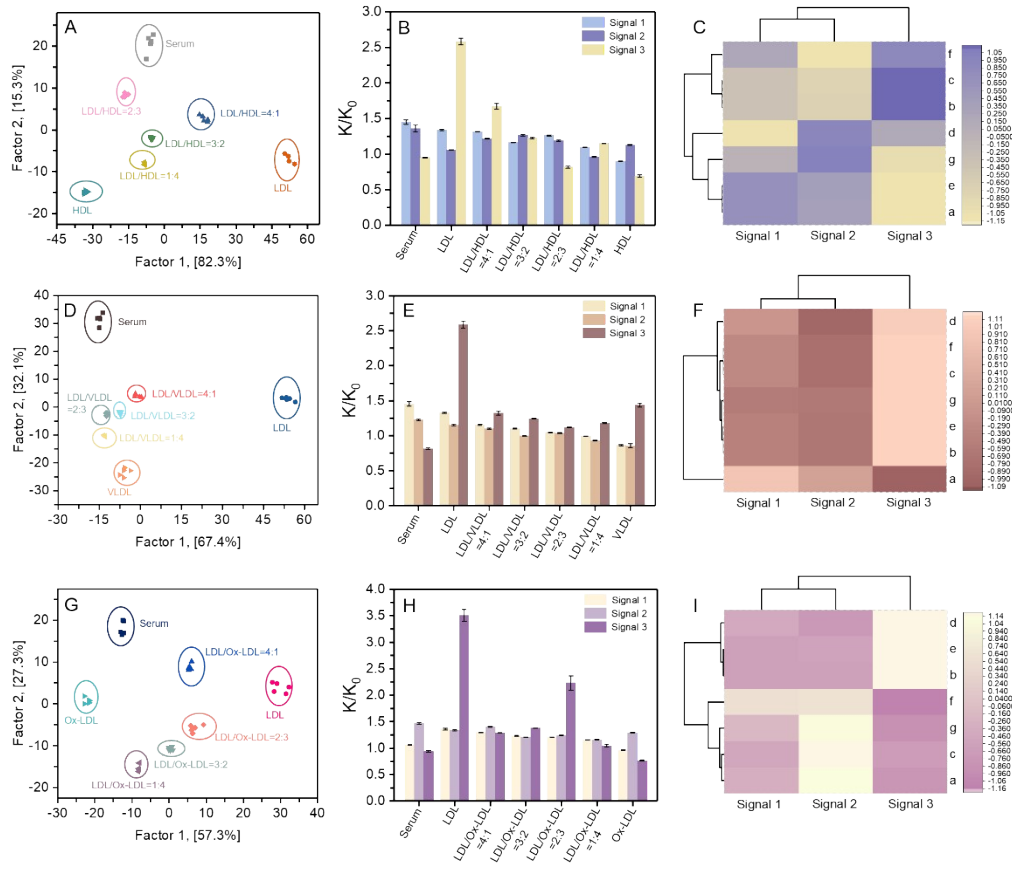

**Fig. S6** (A) LDA plot for the mixture of LDL/HDL, pure LDL and HDL in human serum; (B) The fingerprints of the binary mixture LDL/HDL based on the patterns of the corresponding values of  $K/K_0$ ; (C) The cluster analysis heat map derived from the discriminator (a: serum; b: LDL; c: LDL/HDL=4:1; d: LDL/HDL=3:2; e: LDL/HDL=2:3; f: LDL/HDL=1:4; g: HDL); (D) LDA plot for the mixture of LDL/VLDL, pure LDL and VLDL in human serum; (E) The fingerprints of the binary mixture LDL/VLDL based on the patterns of the corresponding values of  $K/K_0$ ; (F) The cluster analysis heat map derived from the discriminator (a: serum; b: LDL; c: LDL/VLDL=4:1; d: LDL/VLDL=3:2; e: LDL/VLDL=2:3; f: LDL/VLDL=1:4; g: VLDL); (G) LDA plot for the mixture of LDL/Ox-LDL, pure LDL and Ox-LDL in human serum; (H) The fingerprints of the binary mixture based on the patterns of the corresponding values of  $K/K_0$ ; (I) The cluster analysis heat map derived from the discriminator (a: serum; b: LDL; c: LDL/Ox-LDL=4:1; d: LDL/Ox-LDL=3:2; e: LDL/Ox-LDL=2:3; f: LDL/Ox-LDL=1:4; g: Ox-LDL).



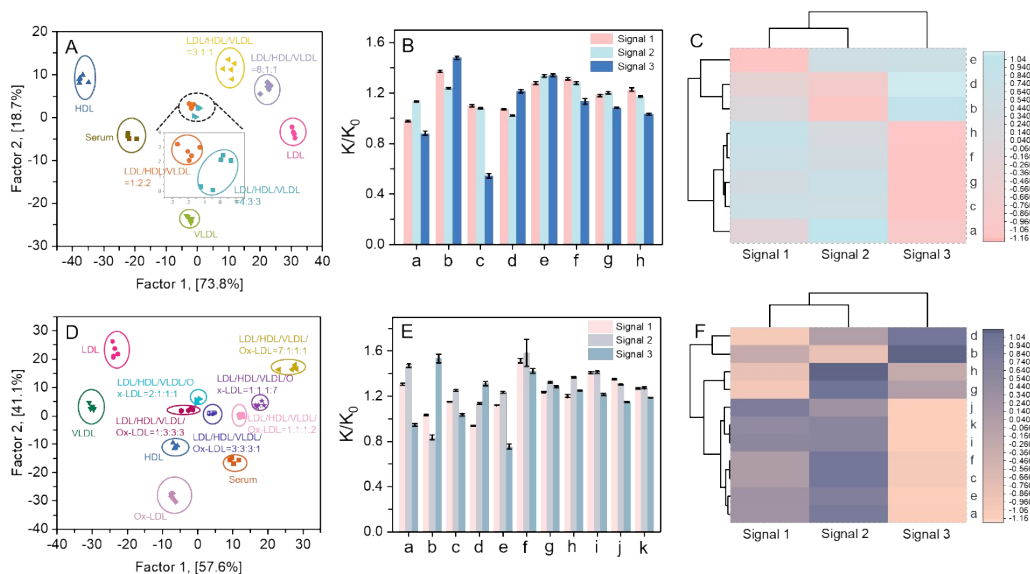

**Fig. S7** (A) LDA plot for the mixture of LDL/HDL/VLDL, pure LDL, HDL and VLDL in human serum; (B) The fingerprints of the ternary mixture based on the patterns of the corresponding values of  $K/K_0$ ; (C) The cluster analysis heat map derived from the discriminator (a: serum; b: LDL; c: HDL; d: VLDL; e: LDL/HDL/VLDL=8:1:1; f: LDL/HDL/VLDL=3:1:1; g: LDL/HDL/VLDL=4:3:3; h: LDL/HDL/VLDL=1:2:2); (D) LDA plot for the mixture of LDL/HDL/VLDL/Ox-LDL, pure LDL, HDL, VLDL and Ox-LDL in human serum; (E) The fingerprints of the quaternary mixture based on the patterns of the corresponding values of  $K/K_0$ ; (F) The cluster analysis heat map derived from the discriminator (a: serum; b: LDL; c: HDL; d: VLDL; e: Ox-LDL; f: LDL/HDL/VLDL/Ox-LDL=7:1:1:1; g: LDL/HDL/VLDL/Ox-LDL=2:1:1:1; h: LDL/HDL/VLDL/Ox-LDL=1:3:3:3; i: LDL/HDL/VLDL/Ox-LDL=1:1:1:7; j: LDL/HDL/VLDL/Ox-LDL=1:1:1:2; k: LDL/HDL/VLDL/Ox-LDL=3:3:3:1).

**Table S1.** Physical properties of the proteins adopted in the present study.

| Protein                             | pI       | Mw (kDa) |
|-------------------------------------|----------|----------|
| Low density lipoprotein (LDL)       | 5.5      | 3000     |
| High density lipoprotein (HDL)      | /        | 300      |
| Very low density lipoprotein (VLDL) | 4.3      | 30000    |
| Oxidized Lipoprotein (Ox-LDL)       | /        | ca. 2000 |
| Cytochrome C (Cyt-c)                | 10.8     | 11       |
| Lysozyme (LZ)                       | 9.6-11.0 | 14       |
| Hemoglobin (Hb)                     | 6.8      | 68       |
| Myoglobin (Mb)                      | 6.99     | 16.7     |
| Human serum albumin (HSA)           | 4.7-4.9  | 66       |
| Trypsin (Tps)                       | 10.5     | 24       |
| $\alpha$ -Casein                    | 4.0      | 57       |
| Ovalbumin (Ova)                     | 4.5      | 44.5     |
| $\gamma$ -Globulin ( $\gamma$ -Glo) | 5.8-8.2  | 200      |
| Immunoglobulin G (IgG)              | 8.0      | 150      |

**Table S2.** The test results for the clinical serum samples obtained from “The Second Affiliated Hospital of Shenyang Medical College” by spectrophotometry using an Automatic Chemistry Analyzer.

| Sample   | LDL<br>(mmol/L) | HDL<br>(mmol/L) | Molar ratio of<br>LDL/HDL |
|----------|-----------------|-----------------|---------------------------|
| <b>1</b> | 1.89            | 1.46            | 1.29                      |
| <b>2</b> | 2.51            | 1.65            | 1.52                      |
| <b>3</b> | 2.69            | 1.63            | 1.65                      |
| <b>4</b> | 4.29            | 1.16            | 3.70                      |
| <b>5</b> | 4.46            | 1.18            | 3.78                      |
| <b>6</b> | 4.29            | 1.13            | 3.80                      |

## References

1. D. Klapak, S. Broadfoot, G. Penner, A. Singh and E. Inapuri, PLoS One, 2018, **13**, e0205460.
2. C. A. Lutomski, S. M. Gordon, A. T. Remaley and M. F. Jarrold, Anal. Chem., 2018, **90**, 6353-6356.
